## RESEARCH ARTICLE

# The evolution of constitutively active humoral immune defenses in *Drosophila* populations under high parasite pressure

Shuyu Olivia Zhou<sup>1\*</sup>, Ramesh Arunkumar<sup>2</sup>, Amina Irfan<sup>1</sup>, Shuai Dominique Ding<sup>1</sup>, Alexandre B. Leitão<sup>3\*</sup>, Francis M. Jiggins<sup>1\*</sup>

**1** Department of Genetics, University of Cambridge, Cambridge, United Kingdom, **2** Section of population genetics, School of Life Sciences, Technical University of Munich, Freising, Germany, **3** Champalimaud Foundation, Champalimaud Centre of the Unknown, Lisbon, Portugal

\* [sz397@cam.ac.uk](mailto:sz397@cam.ac.uk) (SOZ); [alexandre.leitao@research.fchampalimaud.org](mailto:alexandre.leitao@research.fchampalimaud.org) (ABL); [fmj1001@cam.ac.uk](mailto:fmj1001@cam.ac.uk) (FMJ)

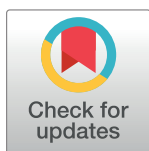

## OPEN ACCESS

**Citation:** Zhou SO, Arunkumar R, Irfan A, Ding SD, Leitão AB, Jiggins FM (2024) The evolution of constitutively active humoral immune defenses in *Drosophila* populations under high parasite pressure. PLoS Pathog 20(1): e1011729. <https://doi.org/10.1371/journal.ppat.1011729>

**Editor:** Elizabeth A. McGraw, Pennsylvania State University - Main Campus: The Pennsylvania State University - University Park Campus, UNITED STATES

**Received:** October 2, 2023

**Accepted:** January 4, 2024

**Published:** January 11, 2024

**Copyright:** © 2024 Zhou et al. This is an open access article distributed under the terms of the [Creative Commons Attribution License](https://creativecommons.org/licenses/by/4.0/), which permits unrestricted use, distribution, and reproduction in any medium, provided the original author and source are credited.

**Data Availability Statement:** The RNAseq data has been submitted to the NCBI Sequence Read Archive under the BioProject number PRJNA1020111, with BioSample accessions from SAMN37513352 to SAMN37513387. Processed data files and scripts to analyze data are available on Apollo, the University of Cambridge repository (<https://doi.org/10.17863/CAM.101651>).

## Abstract

Both constitutive and inducible immune mechanisms are employed by hosts for defense against infection. Constitutive immunity allows for a faster response, but it comes with an associated cost that is always present. This trade-off between speed and fitness costs leads to the theoretical prediction that constitutive immunity will be favored where parasite exposure is frequent. We selected populations of *Drosophila melanogaster* under high parasite pressure from the parasitoid wasp *Leptopilina boulardi*. With RNA sequencing, we found the evolution of resistance in these populations was associated with them developing constitutively active humoral immunity, mediated by the larval fat body. Furthermore, these evolved populations were also able to induce gene expression in response to infection to a greater level, which indicates an overall more activated humoral immune response to parasitization. The anti-parasitoid immune response also relies on the JAK/STAT signaling pathway being activated in muscles following infection, and this induced response was only seen in populations that had evolved under high parasite pressure. We found that the cytokine Upd3, which induces this JAK/STAT response, is being expressed by immature lamellocytes. Furthermore, these immune cells became constitutively present when populations evolved resistance, potentially explaining why they gained the ability to activate JAK/STAT signaling. Thus, under intense parasitism, populations evolved resistance by increasing both constitutive and induced immune defenses, and there is likely an interplay between these two forms of immunity.

## Author summary

Immune defenses can be induced after infection or they may be constitutively active, even in uninfected individuals. As constitutive immunity is a more rapid response, theory predicts that it will be favored when animals frequently encounter parasites. When we subjected populations of *Drosophila melanogaster* to high rates of parasitization from its

**Funding:** This work was funded by the following grants awarded to Francis M. Jiggins: Leverhulme Trust grant (RPG-2020-236), Natural Environment Research Council grant (NE/P00184X/1), and Biotechnology and Biological Sciences Research Council (BBSRC) grant (BB/V000667/1). Shuyu O. Zhou receives a student stipend from the Gates Cambridge Trust. Ramesh Arunkumar receives a salary from a Peter and Traudl Engelhorn Stiftung postdoctoral fellowship. The funders had no role in study design, data collection and analysis, decision to publish, or preparation of the manuscript.

**Competing interests:** The authors have declared that no competing interests exist.

natural parasite, *Leptopilina boulardi* parasitoid wasps, we indeed observed that the immune response became constitutively active. Uninfected insects had an activated humoral immune response and produced cytokine-secreting immune cells that were normally induced after infection. However, we also found that these populations evolved a greater induced response. This included a greatly increased cytokine response after infection, suggesting that the constitutive activation of some aspects of the immune system may allow a greater induced response in other tissues.

## Introduction

The innate immune system utilizes both constitutive and induced mechanisms for defense [1–3]. Constitutive immunity is always active, regardless of the presence of infection, whereas induced immune mechanisms are activated only in response to infection. Constitutive defense includes the production of antimicrobial peptides (AMPs) [4] and the presence of circulating immune cells in the absence of infection. On the other hand, induced immunity has the potential to be amplified many times, such as the massive upregulation of AMPs in response to microbial infections and the proliferation and differentiation of immune cells [4]. Constitutive immunity can provide an immediate response and eliminate pathogens in the early stages of an infection. Nevertheless, immunity is costly to organisms, and constitutive immunity diverts energy from other components of fitness to defense [5–7]. While costs from constitutive immunity are always present, inducible defense mechanisms impose minimal costs when pathogens are absent. However, mounting an inducible response can be time-consuming, leading to a trade-off between the speed of response and the fitness costs [2,8].

Theoretical models predict that a key factor determining whether constitutive or induced mechanisms are favored is the probability of encountering a parasite, where frequent parasite exposure in a predictable environment favors constitutive defenses [1,2,9]. This is because when infection is common the benefits of a more effective constitutive defense increase, while the advantages of switching off inducible defenses when there are no parasites reduce. In addition to this core factor, characteristics of the parasite, such as virulence and effects on host reproduction, and characteristics of the host, such as lifespan, are all predicted to further alter the relative investment in the two forms of defense [2]. Furthermore, theory suggests that when faced with variable parasite growth rates hosts will adopt both constitutive and induced defenses, potentially explaining why such combined strategies are seen extensively in nature [10]. The type of defense adopted by a host has knock-on effects for the evolution of immune systems and infection, shaping for example recovery times after infection and whether infections are cleared or tolerated [11].

To test these theoretical predictions, Westra et al. investigated bacteria and phage [1]. They found that higher phage exposure drives the evolution of costly changes to surface receptors used by the phage to enter cells—a form of constitutive defense—, while low rates of phage exposure favored inducible CRISPR-CAS defenses [1]. To examine whether this process also shaped the design of animal immune systems, we tested whether inducible immunity became constitutive when parasites are common using a model of flies and parasitoids. After artificially evolving *Drosophila melanogaster* populations under high rates of parasitism by the parasitoid wasp species *Leptopilina boulardi* we found that the populations evolved a constitutively active cellular immune defense [8]. Immune cells in *D. melanogaster* are called hemocytes and have similar functions to leukocytes in vertebrates. Using single-cell RNA sequencing, we found that immature lamellocytes, a type of hemocyte that appears through differentiation in

response to parasitization, became constitutively present in these evolved populations [8]. The total and circulating hemocyte numbers also increased with frequent parasite exposure, again mimicking the induced immune response [8,12]. Moreover, the transcriptional signature of hemocytes from uninfected larvae of these populations also displays constitutive upregulation of immune-inducible genes [8]. All these constitutive defense mechanisms likely contributed to the increased level of resistance in these populations.

When a parasitoid wasp lays its egg inside *D. melanogaster*, the fly larva launches an anti-parasitoid immune response following infection, which can be divided into cellular and humoral responses [4,13,14]. Cellular responses include the proliferation of hemocytes and the differentiation of specialist lamellocytes that function to encapsulate the parasitoid egg in a multilayered cellular capsule [15–17]. The capsule becomes melanized through phenoloxidases activity mediated by crystal cells and lamellocytes, eventually killing the parasite [18]. Humoral immunity is mediated by the fat body of the *D. melanogaster* larva, which is the metabolic hub of the organism, functionally similar to the mammalian liver. The larval fat body is responsible for the secretion of systemic humoral immune effectors. For example, antimicrobial humoral immunity in *D. melanogaster* is mediated by the two hallmark NF- $\kappa$ B signaling pathways in the fat body—Toll and Imd pathways—which upregulate effectors such as antimicrobial peptides [4,14]. However, the role of humoral immune mechanisms in anti-parasitoid immunity is not well characterized. A few secreted immune effectors have been shown to be involved in this response, including thioester-containing proteins (TEPs), where their mammalian counterparts are complement factors involved in the complement cascade [19], a C-type lectin called *lectin-24A* shown to be crucial in the encapsulation response [20], and serine proteases which play key roles in the melanization reaction and Toll pathway activation [21,22].

In addition to the involvement of the two immune tissues, fat body and hemocytes, in the anti-parasitoid response, there exists an interplay between hemocytes and somatic muscles in the *D. melanogaster* larvae. Wasp infection induces the expression of the cytokines Upd2 and Upd3 by circulating hemocytes, which induce of JAK/STAT activity in somatic muscles [23]. Furthermore, JAK/STAT activation in muscles is shown to be required for the encapsulation response, including lamellocyte formation [23].

In this study, we investigated how the constitutive and induced humoral immune defenses have evolved with high rates of parasitism. We conducted RNA sequencing on the larval fat bodies of *D. melanogaster* populations evolved under high parasite pressure or no parasite pressure (Fig 1A). As the developing gonad is part of the fat body, we restricted this experiment to males to avoid any sex differences in gene expression confounding our analyses. This allowed us to examine the expression of immunity genes changed as resistance evolved, and whether these changes were constitutively present before infection or were inducible after infection.

## Results

### The evolution of resistance leads to constitutive expression of immune-inducible genes in the larval fat body

Six experimental populations of *D. melanogaster* were established from 377 wild-caught *D. melanogaster* females [8]. Three of these (N1-3) were maintained with infection by the NSRef strain of the parasitoid wasp *Leptopilina boulardi* at every generation, where flies that survived by launching a successful encapsulation and melanization response were used to establish the next generation [8] (Fig 1A). The other three populations (C1-3) were not parasitized but were otherwise maintained under the same conditions. The populations maintained with high parasitism evolved resistance. After 56 generations, about 50% of flies successfully encapsulated

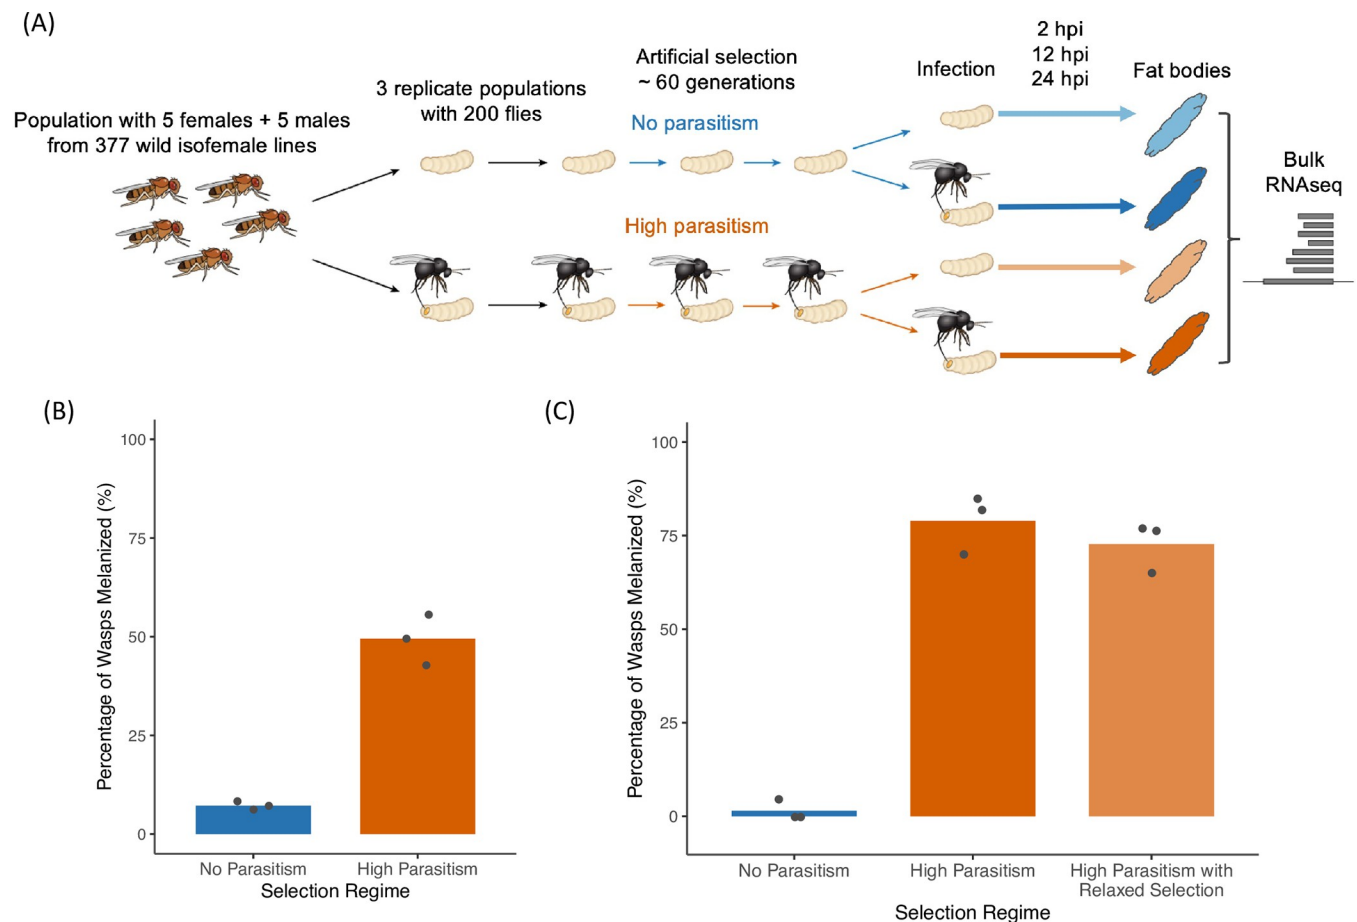

**Fig 1. Selection of *D. melanogaster* populations for resistance to parasitoid wasp *Leptopilina boulardi*.** (A) Schematic of experimental design. RNA sequencing was conducted at around the 60th generation of selection. (B) The rate of successful melanization of parasitoids in populations maintained with no parasitism and those maintained with high parasitism after 56 generations. Bars represent the mean per selection regime. Points represent replicate populations. Ten replicates of around 50 larvae were assayed per population. (C) The rate of successful melanization of parasitoids in populations after around 100 generations of selection, where one population evolved under high parasitism was allowed to evolve with relaxed selection for 5 generations. Bars represent the mean per population, where one population from each selection regime was used. Points represent replicate experiments, where each point represents at least 20 larvae. Fig 1A is modified from Leitão et al. [8].

<https://doi.org/10.1371/journal.ppat.1011729.g001>

and melanized the wasps, while the no parasitism controls were only able to melanize less than 10% (Fig 1B; Welch's  $t$ -test, d.f. = 2.09,  $p$ -value = 0.0064). After around 100 generations of selection under high parasitism, we derived one population from N3 with relaxed selection, maintaining without parasitism for 5 generations. In these conditions, this population still maintained high rates of melanization, indicating that it is not a result of transgenerational effects from parental exposure to wasps (Fig 1C).

We found previously that high parasitism rates had led to a more active cellular encapsulation response in the populations, including the constitutive presence of immature lamellocytes [8]. A constitutive increase in the number of circulating hemocytes was also observed in these populations [8]. To investigate how humoral immunity has evolved in *D. melanogaster* populations under high pressure of parasitism, we collected the fat bodies of larvae by dissection from each of the six populations. As the developing gonads are part of the larval fat body, we only used male larvae for this experiment. We analyzed the transcriptional response to infection at 2-, 12-, and 24-hours post-infection (hpi), as well as the transcriptome of fat bodies from age-matched uninfected larvae (Fig 1A).

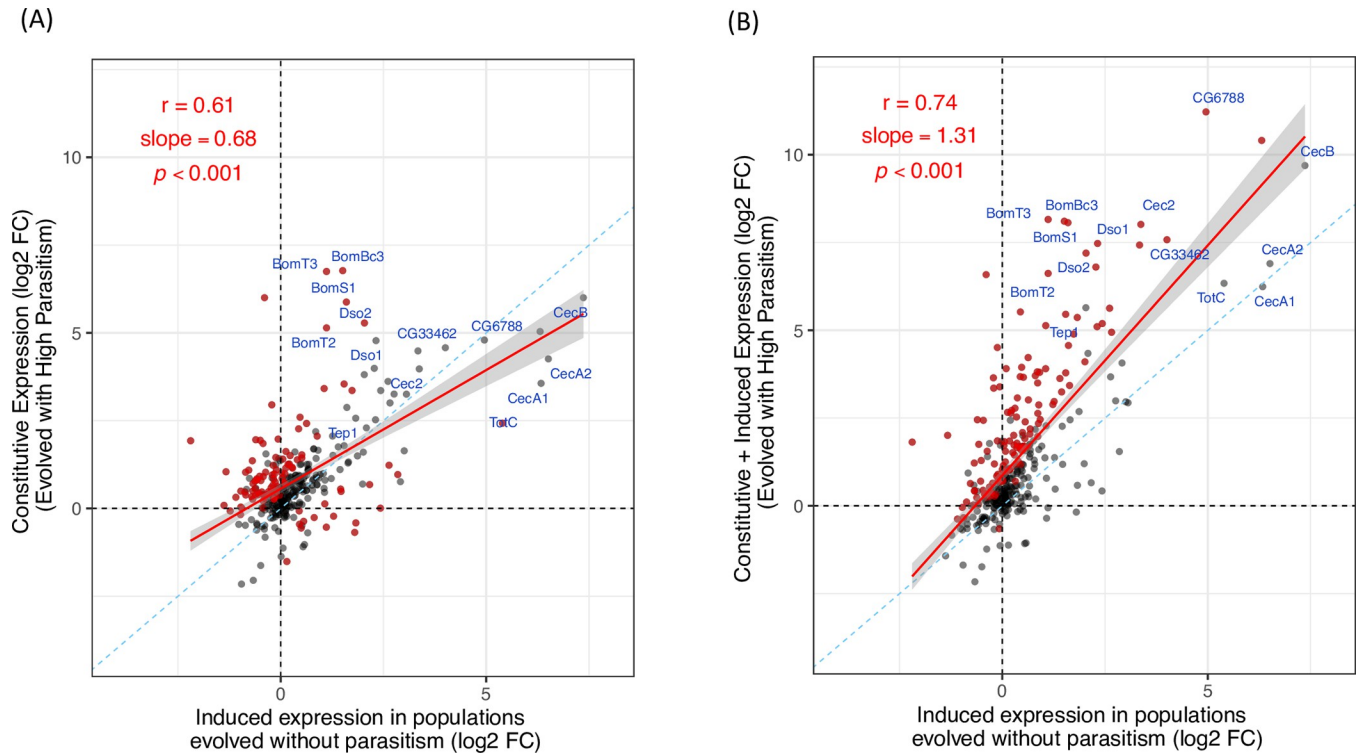

**Fig 2. Changes in gene expression in the fat body following selection for resistance and parasitoid infection.** In both panels the X axis represents the change in gene expression following infection in populations maintained without parasitoid infection. (A) Y axis represents the constitutive (uninfected) gene expression in populations selected for resistance to parasitoid *L. boulearidi* infections relative to control populations. (B) Y axis represents the combined induced and constitutive changes in gene expression in populations selected for resistance to parasitoids, which is the expression profile of the selected populations under infected conditions in comparison to the control populations under uninfected conditions. The dotted blue diagonals indicate the 1:1 line. Red lines indicate fitted linear models to the data, with shaded area as 95% confidence intervals.  $r$  = Pearson correlation coefficient. Relative expression as  $\log_2$ FC. Red points represent genes with significant differential expression between the two axes.

<https://doi.org/10.1371/journal.ppat.1011729.g002>

We investigated whether the humoral immunity of the selected populations would exhibit a similar constitutively active state as the cellular immune response. Comparing the mean gene expression profiles across the three time points, we see that both infection and selection with parasitoids alter gene expression in the larval fat body. We found that when flies adapted to high rates of parasitism, the uninfected larval fat body exhibits similar transcriptional changes as the fat body of infected flies that have not undergone parasitism every generation. To avoid ascertainment bias, we used data from an independent study of the larval fat body to define a set of 329 parasitism-responsive genes that were significantly differentially expressed with a  $\log_2$  fold change ( $\log_2$ FC) of greater than one after parasitoid infection. Among these genes, the constitutive changes in expression in the populations adapted to high rates of parasitism were correlated with the infection-induced expression in the populations that were not evolved with parasite pressure (Fig 2A). However, overall the transcriptional response seen after infection was greater than the change in gene expression seen in uninfected larvae that had evolved resistance (Fig 2A). This correlation in transcriptional profiles shows that the humoral immunity was partially activated in the evolved populations before the larvae were infected.

The genes that show large transcriptional changes with constitutive induction or after infection tend to be upregulated as opposed to downregulated, which is consistent with the role of the fat body in secreting immune effectors (Fig 2). Among the 33 genes that showed  $\log_2$ FC of greater than 4 with constitutive induction and/or infection (Fig 2B), 73% are predicted to be

secreted, compared to 9% in the full set of genes included in the RNAseq. This indicates that the genes showing large transcriptional inductions in the fat body are significantly enriched for secreted factors (Fisher's Exact Test,  $p$ -value =  $1.99 \times 10^{-19}$ ).

To further understand the effect of selection on the basal humoral immunity level of the selected populations, we compared the expression profiles between selected and control populations, under uninfected conditions across the three time points. After filtering out lowly expressed genes, we detected 9962 genes in the fat body. There is a total of 338 significantly differentially expressed genes with absolute  $\log_2$ FC of greater than 1. Taking the 30 most significant of these, the pattern of selection increasing expression more than decreasing expression is apparent (Fig 3A). These highly significant genes include short secreted peptides of the Bomanin family, which are regulated by the Toll pathway with antifungal and antibacterial activities [24], are more highly expressed in selected populations (Fig 3A). Upon a gene ontology (GO) enrichment analysis of the upregulated genes, we also observed an enrichment of serine-type peptidase activity (GO: Molecular Function) in the populations evolved with high rates of parasitism (e S1A Fig). For instance, *CG30090*, *CG33462*, and *SPH93* are all serine proteases (Fig 3A) [25]. Proteolytic cascades of extracellular serine proteases play an important role in the regulation of immune responses, including the melanization reaction and activation of the Toll pathway [21,22,26–28].

Comparing between the selected populations, the N3 population shows a higher level of expression for some of the top differentially expressed genes, under both the uninfected and infected conditions (Fig 3). This suggests that the N3 population has evolved an anti-parasitoid response that is more elevated than the other two populations. To investigate how this response differed among our replicates we took the 30 most significantly differentially expressed genes for the N3 population in contrast to the control populations and examined these genes in the other replicate populations (S2 Table). In uninfected larvae, 24 and 26 of the 30 genes show the same direction of differential expression in the N1 and N2 populations as in N3, respectively (S3 Table). In infected larvae, 29 and 28 of the 30 change in the same direction in N1 and N2, respectively (S3 Table). Thus, it seems that the three populations evolved under high parasitism evolved qualitatively similar transcriptional responses to selection, but the magnitude of this response is greater in the N3 population.

### Populations evolved under the pressure of high parasitism rates can induce gene expression to a greater level

We see a higher level of humoral response in the evolved populations. Following infection, the parasitism-inducible genes showed an overall higher level of expression in the populations that had evolved under high rates of parasitism than those evolved without parasitism (Fig 2B). This was in contrast to what we previously found for cellular immunity, where the gene expression profiles become similar between the selection regimes after infection [8].

Under infected conditions, 398 significantly differentially expressed genes, with false discovery rate (FDR) of less than 0.05 and absolute  $\log_2$ FC of greater than 1, were found between the populations evolved with high rates of parasitism and those maintained without, indicating that there are still substantial differences in transcriptional expression even with parasitoid infection. The genes that are differentially expressed largely show higher expression in the populations evolved with high parasite pressure (Fig 3B). Strikingly, key components of three major immune signaling pathways (Toll, Imd, and JAK/STAT pathways) all show up within the top 30 significantly differentially expressed genes: *Tl*, *Dif*, *dl*, *Rel*, and *hop*. These genes are all significantly upregulated in the populations evolved with high parasitism, suggesting that these pathways are more active in the selected populations under the infected state. GO

(A) Uninfected

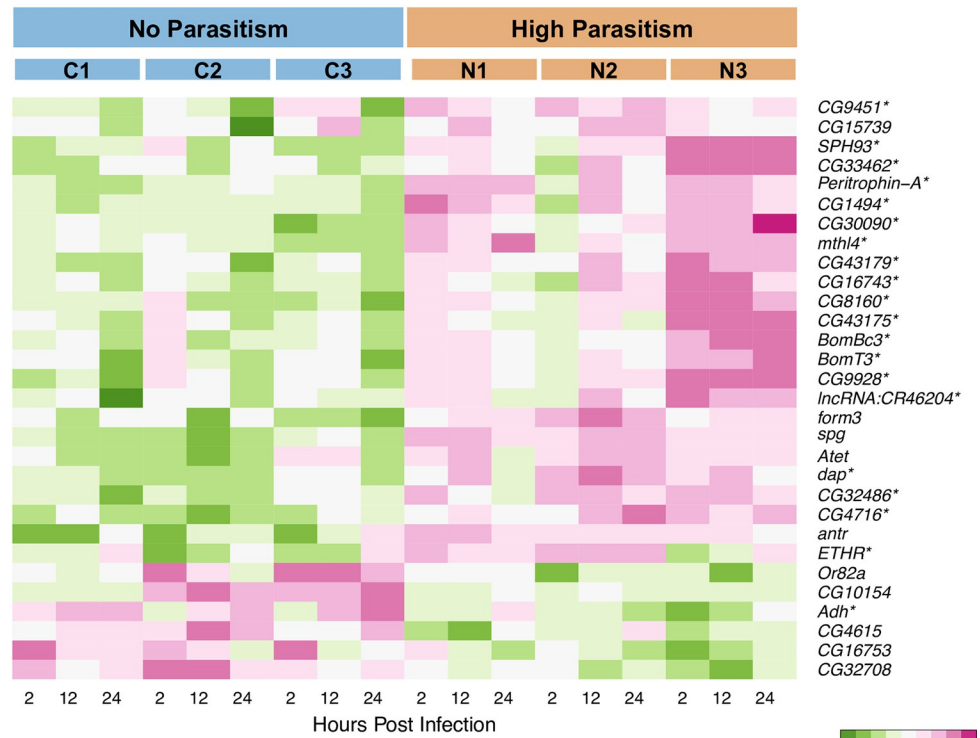

(B) Infected

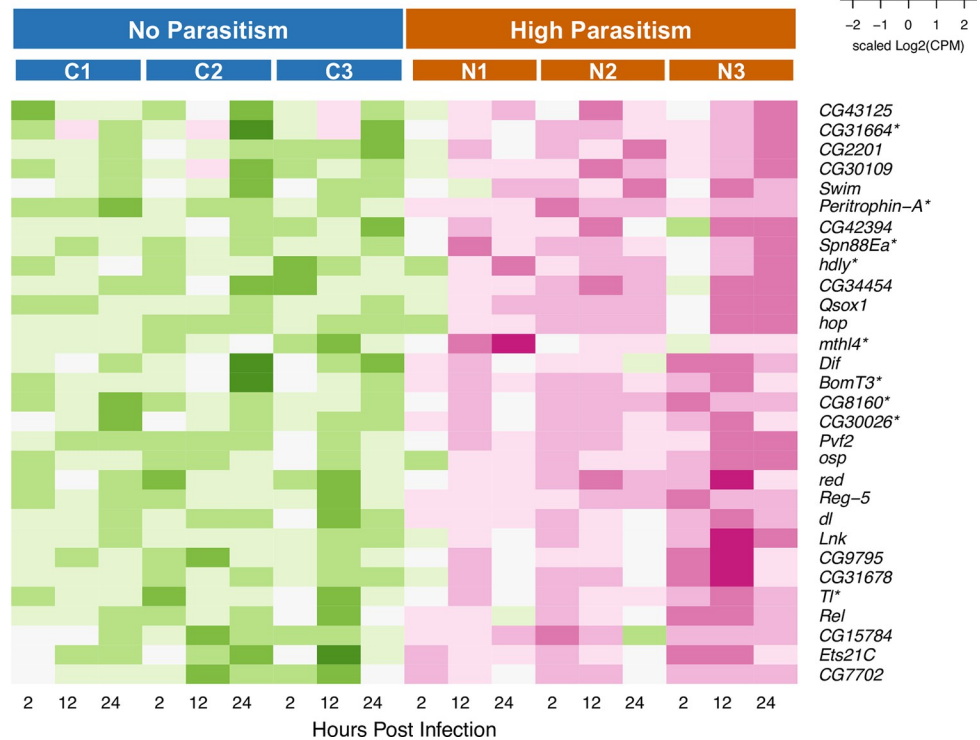

**Fig 3. Differential expression of genes in the fat body between selection regimes.** (A) The 30 most significantly differentially expressed genes under uninfected conditions over three time points (2, 12, 24 hpi). (B) The 30 most significantly differentially expressed genes after infection by the parasitoid wasp *L. bouleardi* NSRef strain. Expression as scaled log<sub>2</sub> counts per million (CPM). Asterisks mark genes found to be significantly differentially expressed in both comparisons.

<https://doi.org/10.1371/journal.ppat.1011729.g003>

enrichment of significantly upregulated genes showed enrichment of terms related to “immune system process”, “defense response”, and “interspecies interaction” (S1B Fig). Therefore, the populations evolved with high parasite pressure displayed an overall more activated humoral immune response in the presence of parasitoid infection.

A number of parasitism-responsive genes showed similar levels of constitutive expression in the selected populations as the infection-induced expression in the control populations; these genes then became even more upregulated in the selected populations with infection (Fig 2). For example, *Tep1* is known to play a role in the melanization of parasitoid eggs [29], and it was expressed more highly in selected populations after infection. Similarly, the serine protease CG33462 and the fibrinogen-like protein CG6788, in addition to a group of antibacterial cecropins, all showed further induction with infection in the populations evolved with high parasitism rates (Fig 2). It is also notable that virtually all the highly induced parasitism-responsive genes have greater levels of expression in the selected populations with infection than in the control populations (Fig 2B;  $\log_2FC > 3$  in control populations).

### The immune response is faster in populations evolved under strong parasite pressure

As the success of the anti-parasitoid immunity is dependent on how fast the fly can launch its defense [30], we hypothesized that the populations evolved under high rates of parasitism had an accelerated transcriptional response with infection. We analyzed the expression changes of 43 significantly differentially expressed genes with immune-related functions 2-, 12-, and 24-hours post-infection (hpi). There is generally higher upregulation of these immune-inducible genes at the 2 hpi time point in the populations maintained with parasitic pressure, relative to the baseline of uninfected populations maintained without parasitism (Fig 4). By 12 hpi, the level of induction of these genes became comparable between the populations. Interestingly, at 24 hpi, the populations evolved with parasitism again showed slightly higher level of transcriptional upregulation of these immune-inducible genes. This result suggests that the significantly differentially expressed immune-related genes are more rapidly and highly upregulated in the evolved populations at the early time point of 2 hpi.

### Only populations evolved under high parasitism rates activate the JAK/STAT pathway after infection

Parasitoid wasp infection can cause hemocytes to secrete the cytokines Upd2 and Upd3, leading to the activation of the JAK/STAT pathway in other tissues [23]. As we had observed upregulation of *hop* (which encodes the *Drosophila* JAK) in the populations adapted to high parasitism rates (Fig 3B), we investigated how JAK/STAT activity had evolved in these populations. We crossed males from the selected or control populations to females expressing a JAK/STAT pathway activity reporter [31]. The reporter expresses GFP under the control of ten Stat92E binding sites from the Stat92E-regulated gene *Socs36E*. At 24 hours post-infection (hpi), we see that JAK/STAT activity is strongly induced in the F<sub>1</sub> progeny from the evolved populations, while there is little or no induction in those from the control populations (Fig 5A; Welch's *t*-test, d.f. = 2.95, *p*-value = 0.0238). Our results suggest that JAK/STAT is activated only after infection only in populations evolving under high parasitism pressure. The JAK/STAT pathway has been shown to be involved in the encapsulation response, where loss-of-function mutations in *hopscotch* results in reduced ability to generate lamellocytes and reduced encapsulation capacity [32]. Thus, the differential activation of JAK/STAT activity between the selected and control populations may play a part in the difference in resistance to parasitoid infection.



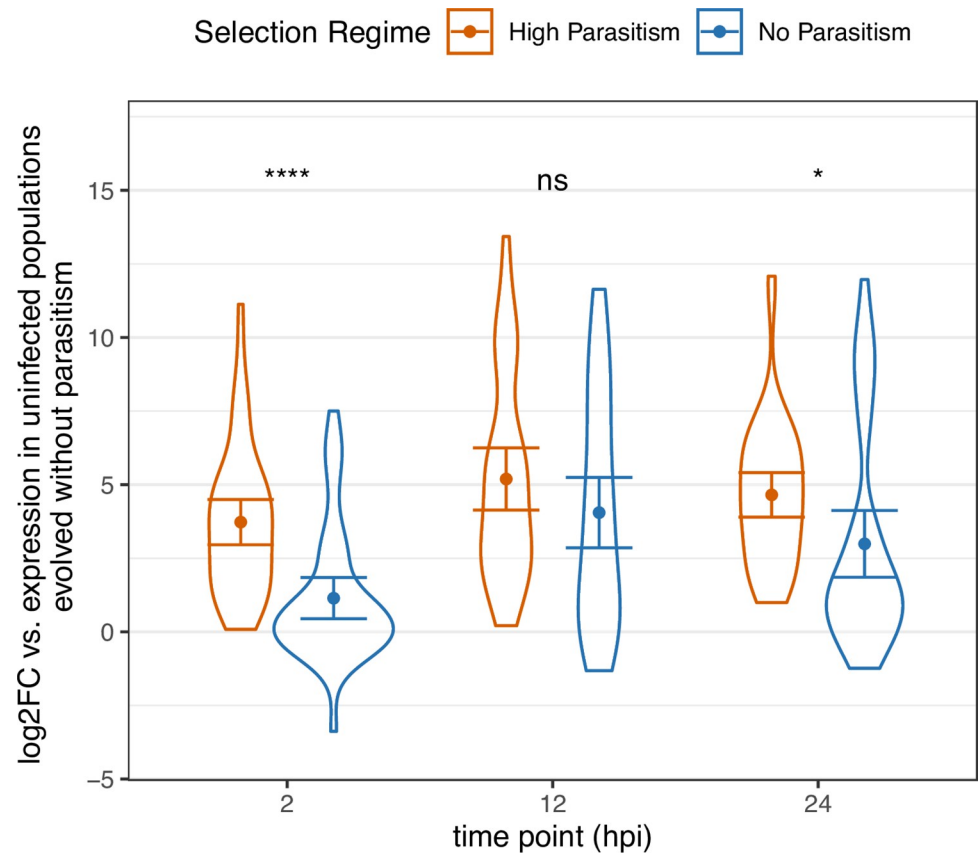

**Fig 4. The speed of response following infection in the populations evolved with high parasitism and those maintained without parasitism.** The induction of immune genes in the fat body is faster in populations evolved with high parasite pressure (at each time point, t-test,  $df = 86$ , \*\*\*\*  $p < 0.00005$ , \*  $p < 0.05$ ). Only genes with immune-related functions shown. Error bars representing 95% confidence intervals.

<https://doi.org/10.1371/journal.ppat.1011729.g004>

JAK/STAT activation in somatic muscles is the result of the cytokines Upd2 and Upd3 being secreted from hemocytes. In a previous study, we found that the immature lamellocyte cell states LAM1 and 2, which are typically only induced by parasitoid infection, become constitutively present in populations selected under high parasitism; the mature LAM3 lamellocyte cell state remains a largely inducible response [8]. To investigate whether this could underlie the difference in JAK/STAT activation, we examined the expression of Upd2 and Upd3 in the different hemocyte cell states present in a *D. melanogaster* larva [8,23]. Utilizing our previous single-cell RNAseq data [8], we found that LAM2 cells are the main *upd3*-expressing cell state, while plasmatocytes and crystal cells show almost no *upd3* expression (Fig 5B). The expression of *upd3* does not change markedly within a cell state upon infection. *upd2* is not included in this dataset as it did not pass the detection thresholds.

LAM2 cells are constitutively present in the populations evolved with high parasitism, and their role as the cytokine-secreting hemocytes suggests that they might act as an early sensing system for the detection of wasp infection in the larvae. When we compare the expression of *upd3* in the three LAM cell states between the evolved and non-evolved populations, we see that in uninfected conditions, there is a higher proportion of *upd3*-expressing cells in the evolved populations compared to the controls across all three cell states (Fig 5C). Of the LAM2 cell state only, the evolved populations have 8-fold more cells expressing Upd3 than the control populations (Fig 5B). LAM2 is the final immature cell state before differentiation into the

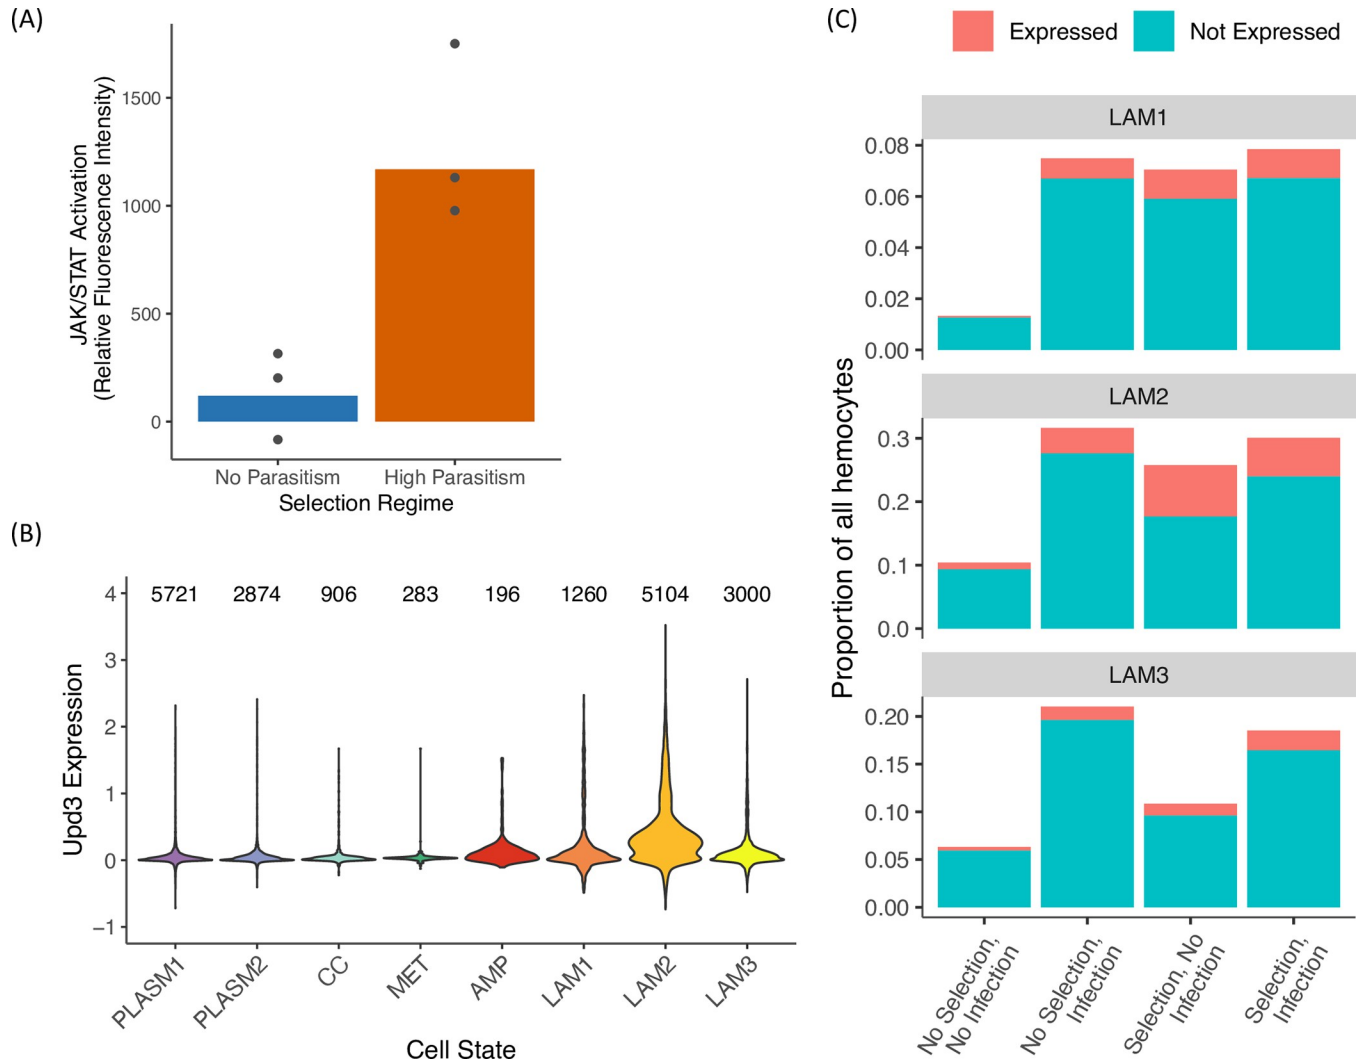

**Fig 5. Differential JAK/STAT pathway activity between the selection regimes.** (A) Females carrying a JAK/STAT pathway activity GFP reporter were crossed to males from the populations maintained under the different selection regimes. F<sub>1</sub> progeny were assayed for GFP expression. Points represent replicate populations. At least 12 replicates for each condition were assayed for each population, where each replicate is a pool of 10 larvae. (B) Expression of *upd3* across the eight hemocyte cell states present in *D. melanogaster* larvae. Y axis represents normalized expression where feature count is divided by total count for each cell and scaled. (C) Proportion of different lamellocyte cell states after infection and selection, subdivided based on expression of *upd3*, where a cell is classified as *upd3*-expressing if the raw read count was above 0.

<https://doi.org/10.1371/journal.ppat.1011729.g005>

mature lamellocyte cell state LAM3 on the hemocyte lineage from plasmatocytes to lamellocytes [8]. Our results suggest that the immature LAM2 cells may play a role in the crosstalk between different parts of the immune system through cytokine secretion, by which they are likely responsible for the cell non-autonomous activation of the JAK/STAT pathway in other larval tissues including the somatic muscles [23].

### Discussion

We investigated how humoral immunity in *Drosophila melanogaster* populations evolved under high parasite pressure. This work complements our previous results on how the cellular immune response changed in response to high rates of parasitism. In contrast to hemocytes, where differences in gene expression largely reflect the differentiation of specialist cell types

for the encapsulation response [8], RNA sequencing in the larval fat bodies is studying the activation of immune pathways and secretion of immune effectors. Our results showed that constitutive humoral immune mechanisms are favored when the probability of parasitization is high, consistent with theoretical predictions [2,33]. The selected *D. melanogaster* populations showed constitutive expression of immune-inducible genes in their larval fat bodies, indicating constitutive secretion of immune effectors for the anti-parasitoid response, even in the absence of infection.

Induced immune responses are a form of phenotypic plasticity, where organisms produce alternative phenotypes depending on their environment, potentially avoiding developing costly traits that are mismatched to the environment [34]. Phenotypic plasticity involves environmental cues triggering adaptive phenotypes—in this case the cues are wounding when the wasp ovipositor pierces the larval cuticle and the presence of non-self wasp molecules [29], while the phenotype is the secretion of immune effectors, and the differentiation and proliferation of immune cells. There has been considerable research into the conditions when phenotypic plasticity will be favored over genetically fixed phenotypes, and a critical factor is the speed at which the phenotype can change [35]. In our case there is a time lag between infection and immune activation because the parasite must be detected, gene expression and metabolism changed, and immune cells must proliferate and differentiate. This leads to a period when there is a mismatch between the environment and phenotype, and if this is sufficiently long then natural selection may favor a genetically fixed phenotype over a plastic one. These time lags may be especially important for immune responses if they allow the parasite to become established or suppress immunity. Our analyses of both cellular [8] and humoral immune responses support the hypothesis that a plastic immune response is less effective at killing parasites than a genetically fixed constitutive response. However, plasticity is nonetheless favored when infection is rare such that the benefit of a match between the environment and phenotype in uninfected larvae outweighs the cost of a less effective plastic immune response in infected larvae.

As parasitoid virulence is high, theory predicts that the parasite will select for higher investment in both constitutive and induced defenses [2]. Our results are consistent with this hypothesis in that we see an increase in both forms of defenses in the populations evolved with high rates of parasitism. However, when we investigated the cellular immunity of these populations, we did not see the same greater overall response—the only differences were before infection, and after infection the populations of immune cells in the selected and control populations were similar [8]. While these findings may be affected by the timepoints we examined, it suggests that the two branches of the immune system may differ in their evolutionary dynamics.

Between the selection regimes, we observe a stark difference in the induced response when we investigated JAK/STAT pathway activity. With infection, we see strong activation of JAK/STAT activity in the selected populations whereas the controls showed no induction (Fig 5). JAK/STAT is an evolutionarily conserved signaling pathway with functions in immunity and defense. It may provide a link between the evolutionary changes we have observed in different tissues as JAK/STAT signaling involves cytokines secreted after infection, which then bind to receptors found on other cells, activating the pathway through an intracellular signaling cascade. The final effector of the pathway is the transcription factor STAT, which translocates when active to the nucleus and activates transcription of target genes. Wasp infection causes two cytokines to be secreted by hemocytes, Upd2 and Upd3, which then activate JAK/STAT activity in other tissues through ligand binding [23]. This non-cell autonomous activation of JAK/STAT signaling in the somatic muscles of *Drosophila* larvae is required for lamellocyte formation and encapsulation [23]. It may also influence transcriptional changes we observed

in the fat body, as septic injury results in hemocyte-specific Upd3 cytokine secretion that activates JAK/STAT signaling in the fat body [36]. Similarly, the expression of the Tot family of stress response genes and the thioester-containing protein Tep1 are controlled by JAK/STAT signaling in the fat body [36–38]. We have previously found that these evolved populations showed constitutively active cellular immunity—particularly the constitutive presence of immature lamellocyte cell state LAM2 [8]. Reanalysing this data, we found that these cells are the main Upd3-expressing hemocyte subtype. It is therefore possible that it is these cells that are responsible for activating JAK/STAT in the evolved populations.

It is known that parasitoid wasps employ various strategies to block and evade host immunity [39–42]. One explanation of our results is therefore that the virulent NSRef strain of *L. boulardi* wasps may be suppressing JAK/STAT pathway activity in susceptible flies while the populations maintained under high parasite pressure have evolved to counter this suppression. If this is the case, the constitutive expression of Upd3 cytokines by hemocytes in these evolved populations in the absence of wasp infection might allow these flies to activate JAK/STAT signaling before the parasitoid venoms can sabotage this defense. Altogether, our results suggest a hypothesis by which constitutively producing previously inducible precursor cell states, the evolved populations can more effectively respond to parasitoid infections through a two-fold mechanism: 1) the constitutive presence of immature lamellocytes allows for the rapid production of mature lamellocytes upon infection, and 2) the cellular immune system is also “primed” to activate other parts of the immune response through the secretion of cytokines by LAM2 before they differentiate into mature lamellocytes. Interestingly, the transcription of Upd3 does not increase in LAM2 cells after infection, so the activation of JAK/STAT may rely on release of cytokines being controlled at the level of translation or secretion, as is common in vertebrates [43,44].

Autoimmune damage may be a price hosts have to pay for resistance to infection. Rapid activation of an intense immune response may be critical for the elimination of a pathogen, but a quick and effective shutdown of the immune system after the infection is necessary to control immunopathology [45]. Immunopathological damage due to an overactive inflammatory response has been shown in insects. The phenoloxidase (PO) cascade, an important feature of insect immunity, can cause tissue damage to vital organs such as the Malpighian tubules, which are functionally equivalent to the human kidney [46,47]. As many tissues in insects are exposed directly to the hemolymph [47], fast-acting non-specific inflammatory responses can easily cause immunopathological damage. Furthermore, hyper-activation of immune responses is often observed with ageing [48–50]. For instance, age-related non-specific AMP expression together with downregulation of negative immune regulators potentially contribute to accelerated ageing in several insects [49,51]. While we did not investigate self-damage, our results suggest potential immunopathological costs both from constitutive activation of immunity in the absence of an infection and overall greater immune activation after infection. In particular, aberrant cytokine signaling through the JAK/STAT pathway underlies many autoimmune disorders found in humans [52]. Our results show both greater Upd3 expression by hemocytes in the absence of infection and higher JAK/STAT activity after infection, indicating potentially high immunopathological costs to the hosts in the evolved populations.

To our knowledge, this is the first model in which the evolution of humoral immunity under high parasite pressure has been studied. Along with our previous findings on the cellular immunity of these selected populations [8], we show that constitutive immunity is favored in two different immune tissues in the *D. melanogaster* larvae when selected for resistance with high rates of parasitism. Future studies on different species and models will provide more insights to how general is this observation of natural selection driving evolution of constitutive defenses when infection is common. Our studies on evolution over short time scales may provide an explanation

more broadly of the evolutionary logic as to why some aspects of host immunity are inducible and others are not, and the reasons why immunopathological disease is so widespread.

## Materials and methods

### Artificial selection of *Drosophila melanogaster*

The *D. melanogaster* lines used were continuations of selections from the populations established by Leitão et al. [8], where the initial source populations were established using isofemale lines founded from 377 females collected in Cambridge, UK in July 2018 using banana and yeast traps set up in an allotment plot (52°12'12.5"N 0°09'00.6"E). Isofemale lines were established by placing single females in vials with cornmeal food (per 1200 ml water: 13g agar, 105g dextrose, 105g maize, 23g yeast, 35ml Nipagin 10% w/v). Five females and five males were collected from the progeny of each isofemale line to create a source population of 3770 flies. The source population was collected into cages and fitted with 90mm apple agar plates (per 1500 ml water: 45g agar, 50g dextrose, 500ml apple juice, 30ml Nipagin 10% w/v) covered with yeast paste (*Saccharomyces cerevisiae*-Sigma-Aldrich #YSC2). The flies carried out overnight egg lays and eggs were collected from the agar plate with phosphate-buffered saline (PBS) using a paintbrush. The eggs were collected in 15 ml centrifuge tubes and allowed to settle to the bottom. Subsequently, 500 µl of the egg solution was transferred into a 1.5ml microcentrifuge tube, from which 6 µl of egg solution was added to plastic vials containing cornmeal food. The vials were kept at 25°C, in a 14-hr light/10-hr dark cycle and 70% humidity. 48 hours after egg transfer, a single female wasp was added into each vial for infection of 24 hours, and some vials were not infected. Vials were then incubated at 25°C for 12 days in total, then flies from infected treatments were collected and randomly sorted into triplicate selection lines (N1-3). Flies that were not infected were sorted into triplicated control populations (C1-3). Each subsequent generation of selected populations were maintained in the same way, while the control populations were maintained with the same protocol without infections. The population sizes were maintained at around 200 adult flies for each.

### Encapsulation assays

Female wasps lay eggs inside the *Drosophila* larval hemocoel through the ovipositor. If successful, the wasp larvae would feed on *Drosophila* larval tissue and emerge from the pupae of the fly as the adult wasp. If the *Drosophila* is successful in its immune defense, the flies encapsulate the wasp eggs, resulting in black melanized capsules which can be visualized under a microscope.

Larval density was controlled for the encapsulation assays in a similar way as the artificial selections (see above section). Two days after egg transfer into cornmeal vials, three female wasps of the *Leptopilina boulardi* strain NSRef were added to each vial for 3 hours of infection at 25°C.

The encapsulation rates assayed after 56 generations of selection were done with adult flies (Fig 1B). For each fly line, we prepared 10 vials with no infection and 20 vials with infection. We then counted the flies that emerged from the vials without infection. Flies that emerged from the infection vials were checked for the presence/absence of encapsulation capsules by squishing anaesthetized flies between two glass microscope slides. These flies were then observed under a dissecting microscope and counted. The formula for calculating encapsulation ratio is as follows:

$$\text{Encapsulation Ratio} = \frac{\text{Capsules}}{\text{Control} - \text{Uninfected}}$$

Capsules is the mean number of flies from infection vials that have visible capsules and Uninfected is the mean number of flies from infection vials with no discernable capsule, and Control is the mean number of flies emerging from vials with no infection. We can then estimate the proportion of infected flies with successful encapsulation per line.

The encapsulation rates assayed after around 100 generations of selection with relaxed selection were done in larvae (Fig 1C). Some flies evolved under high parasitism pressure were allowed to evolve with relaxed selection for 5 generations. For each fly line, 3 replicate vials were prepared for infection. At 48 hours post-infection, fly larvae were dissected for the presence of melanized capsules or wasp larvae. Fly larvae that did not have either were determined to be uninfected. Only infected larvae were counted in the encapsulation ratio calculation, following the formula below:

$$\text{Encapsulation Ratio} = \frac{\text{Capsules}}{\text{Capsules} + \text{Wasp Larvae}}$$

Capsules is the number of fly larvae with visible melanized capsules without any wasp larva that have not been melanized, and Wasp Larvae is the number of fly larvae with at least one wasp larva that are not melanized inside them.

### Wasp maintenance

*Leptopilina boulardi* strain NSRef [53] was maintained using a susceptible *D. melanogaster* out-bred population. Eggs were added to vials of cornmeal fly food as described above. Two female wasps and one male wasp were added to each vial, where the vials were then incubated at 25°C for 24 days, in a 14-hr light/10-hr dark cycle and 70% humidity. Adult wasps were collected and maintained in cornmeal vials with a drop of honey added to the cotton plug.

### Larval fat body preparation

Larval fat bodies were dissected from late 2<sup>nd</sup> instar to early 3<sup>rd</sup> instar *D. melanogaster* larvae. The whole fat body was obtained by first removing the head of the larva then pulling back the cuticle to expose the fat body and other inner organs. The gut, salivary gland, and other organs were then removed and discarded. Each fat body is dipped in a clean drop of PBS immediately following dissection to wash off any hemocytes that might be attached to the surface, and then transferred into a screw cap 0.5 ml tube containing 50 µl of ice-cold PBS. After 10 fat bodies had been transferred and pooled in a tube on ice, the fat bodies were then spun down by pulse centrifugation. The PBS supernatant was then removed by pipetting carefully off the top without disturbing the fat bodies which had collected at the bottom of the tube.

### Library preparation for RNA sequencing

At 2 hpi, 12 hpi, and 24 hpi, groups of 10 male larvae were dissected for fat bodies from each of the control and selected populations. Fat bodies from uninfected larvae were also dissected from groups of 10 male larvae from each population at the same time points. RNA was isolated from the dissected fat body tissues. For each sample, as soon as 10 fat bodies were pooled, 350 µl of Tri-reagent (Ambion 10296010) was added immediately, and the fat bodies were homogenized by vortexing for 5–10 seconds. 70 µl of chloroform was added and the tubes were shaken for 15 seconds and then incubated at room temperature for 3 minutes. Samples were then centrifuged for 10 minutes at 12,000g at 4°C. 100ul of the upper aqueous phase was transferred to a fresh Eppendorf tube and 175 µl of propan-2-ol was added and mixed by inverting the tubes several times. After incubating 10 minutes at room temperature, the tubes

were centrifuged at 12,000g at 4°C for 10 minutes. The supernatant was removed and 350 µl ice-cold 70% ethanol was added. Centrifuge at 4°C for 2 minutes at 12,000g and the ethanol was removed and the RNA pellets were air dried briefly and 20 µl of nuclease-free water was added. The RNA pellets were fully dissolved by incubating tubes at 45°C for 5 minutes on a heat block. RNA was quantified using a Qubit RNA HS assay kit (ThermoFisher Q32852). RNAseq libraries were prepared using a NEBNext Ultra II Directional RNA Library Prep Kit for Illumina (New England Biolabs E7760S) with NEBNext Multiplex Oligos for Illumina (96 Unique Dual Index Primer Pairs) (New England Biolabs E6440S) and polyA enrichment module (NEB E7490S). Up to 1µg of total RNA was used to make each library. mRNA was fragmented at 94°C for 15 minutes after polyA enrichment, according to the manufacturer's recommendations. Adaptor concentrations and number of amplification cycles were adjusted according to the amount of starting material. The quantity of each prepared library was then measured using Qubit DNA HS assay kit (ThermoFisher Q32851). The quality of each library was assessed using a Bioanalyzer high sensitivity kit on an Agilent 2100 Bioanalyzer (Agilent 5067–4626). The libraries were submitted for sequencing at Cancer Research UK Cambridge Institute Genomic Core Facility using Illumina NovaSeq with 100bp single-end reads.

### Statistical analyses of RNAseq data

Trim Galore ([https://www.bioinformatics.babraham.ac.uk/projects/trim\\_galore/](https://www.bioinformatics.babraham.ac.uk/projects/trim_galore/)) was used to trim raw RNAseq reads, with a Phred score of 20 for quality control. Reads with fewer than 50 bases after trimming were removed. The reads were then mapped and counted using STAR v2.6.0 [54] to *D. melanogaster* reference genome Dmel-r6.43.

The R package edgeR (RRID:SCR\_012802) was used for differential expression analyses. Genes that had a count per million (CPM) above ten in at least three libraries were kept. This served as a threshold for identifying genes with detectable expression in our dataset. To increase our statistical power, we combined the data across the three time points in our analysis and compared the mean gene expression profiles. Dispersions were estimated using the Cox-Reid profile-adjusted likelihood (CR) method in edgeR, and the expression data were fitted with a negative binomial generalized linear model (GLM). Differential expression of genes was then determined with a quasi-likelihood (QL) *F*-test, where a false discovery rate (FDR) of 0.05 was set as the significance threshold.

To increase statistical power, when comparing expression levels between selected and control populations, we combined the data across the three time points at which the samples were collected and only contrasted between selection and immune challenge.

### Changes in gene expression following selection/infection analysis

Data from an independent study of the *D. melanogaster* larval fat body were used to define a set of 329 parasitism-responsive genes that were significantly differentially expressed with a logFC of greater than 1 following wasp parasitization. The raw RNAseq reads from this independent study were deposited in the NCBI Sequence Read Archive under the BioProject number PRJNA1021619. This independent study is of the transcriptional response in the larval fat body after wasp parasitization with the fat body in posterior and anterior sections. The posterior and anterior data were combined to generate a list of parasitism-responsive genes in the *D. melanogaster* larval fat body. The line used in this study is a promoter reporter line expressing a Venus fluorescence protein under the promoter of the *lectin-24A* gene, created using a line harboring an attP site on the X chromosome (BDSC # 24408) [20].

### Enrichment for secreted proteins analysis

A list of all secreted proteins in *D. melanogaster* was extracted from *Drosophila melanogaster* extracellular domain database (FlyXCDB) [55].

### Counts-per-million (CPM) expression heatmap analysis

Expression data were produced using the R package edgeR, where moderated  $\log_2$  counts-per-million (logCPM) data were computed. The logCPM values were then scaled for each gene in the heatmaps, by centering on the mean value and dividing by standard deviation. The gplots and RColorBrewer (RRID:SCR\_016697) packages were used for visualization of the data [56,57].

### Speed of response analysis

To analyze the differential speed of anti-parasitoid response between the populations selected under high rates of parasitism and the control populations, we first extracted a list of genes that are significantly upregulated with logFC over 1.5 for either the populations adapted to high rates of parasitism or the control populations, averaging the expression profiles over the three time points included in the RNAseq. Within this list of significantly upregulated genes, we then extracted immune-related genes corresponding to the FlyBase GO annotation “Immune System Process” (GO:0002376) and all its daughter terms.

The logFC of each of these genes was then computed against a baseline expression level of the control populations under uninfected condition at each time point. A two-sample t-test was used to compare the mean logFC at each time between selected and control populations.

### Gene Ontology enrichment analyses

A Gene Ontology (GO) enrichment analysis was conducted using the R package goseq [58]. The list of genes detected in RNAseq analysis was used as a background set. Sets of significantly upregulated and significantly downregulated genes with an FDR < 0.05 and up or down-regulation of at least one logFC were then analyzed separately to determine GO enrichment. The length bias inherent to RNAseq data were accounted for by calculating a Probability Weighting Function (PWF) using goseq, that gives a probability that a gene will be differentially expressed based on its length alone. A null distribution for GO category membership was approximated with Wallenius distribution, and each GO category is then tested for over and under representation amongst the set of differentially expressed genes.

Where there are more than 10 GO terms in any of the three major Gene Ontology branches (Biological Processes, Cellular Components, and Molecular Functions), the list of GO terms was summarized using REVIGO [59] (RRID:SCR\_005825).

### JAK/STAT pathway activity reporter assay

JAK/STAT pathway activity was evaluated by preparing samples of larval tissue lysate. At least eight independent samples were made from each cross (between females carrying reporter construct and males from each selection regime). Eight to ten third instar larvae are collected for each sample, and tissue lysed in 100ul of PBS with about ten 1.0mm diameter zirconia/silica beads (Thistle Scientific # 11079110z) using Qiagen TissueLyser II (Qiagen # 85300) for 2 minutes at 30Hz. The samples were immediately spun down at 4000rpm for 10 minutes at 4°C, and 50ul of the supernatant for each sample were transferred into a well in a flat clear-bottom black polystyrene 96-well plate (Corning # 3603) for fluorescence reading with a SpectraMax iD3 Plate Reader (Molecular Devices) using the SoftMax Pro 7 software. GFP fluorescence



intensity is measured with excitation at 485nm and emission at 535nm. The rest of the supernatant for each sample is used to measure the total protein level of the sample with a Bradford assay (Merck # B6916), following reagent protocol. The total protein level was used as a normalization of GFP relative intensity.

### JAK/STAT activity analysis

We tested for the difference in the induction of JAK/STAT activity between the selection regimes using the method described above and analyzed the data with a linear mixed-effects model using the function below using the R package nlme [60]:

$$lme\left(\frac{\text{Relative fluorescence intensity}}{\text{Total protein quantity}} \sim \text{Selection*Treatment}, \text{random} = 1|\text{Population}\right)$$

### Single-cell RNA sequencing analysis

The single-cell RNAseq analysis was done using our previous dataset from Leitao et al. [8]. Analysis was carried out using the R packages Seurat [61] (RRID: SCR\_007322) and reshape2 [62].

### Supporting information

**S1 Fig. Gene ontology (GO) enrichment for significantly upregulated genes comparing between selection regimes.** (A) GO enrichment for significantly upregulated genes for populations evolved with high parasitism pressure compared to control populations under uninfected conditions. (B) GO enrichment for significantly upregulated genes for populations evolved with high parasitism pressure compared to control populations after infection by parasitoid wasps. BP—Biological Processes, CC—Cellular Components, MF—Molecular Functions. (PDF)

**S1 Table. Counts per million (CPM) for all detected genes across all samples.** Sample names are indicated as population\_time point\_treatment. (CSV)

**S2 Table. The 30 most differentially expressed genes in each evolved population compared to control populations.** Gene names and log<sub>2</sub> fold changes are included. (CSV)

**S3 Table. The differential expression patterns of the 30 most differentially expressed genes in the N3 population for the other two evolved populations.** Gene names and log<sub>2</sub> fold changes are included. (CSV)

### Author Contributions

**Conceptualization:** Shuyu Olivia Zhou, Alexandre B. Leitão, Francis M. Jiggins.

**Data curation:** Shuyu Olivia Zhou.

**Formal analysis:** Shuyu Olivia Zhou, Ramesh Arunkumar.

**Funding acquisition:** Francis M. Jiggins.

**Investigation:** Shuyu Olivia Zhou, Amina Irfan, Shuai Dominique Ding, Alexandre B. Leitão.

**Methodology:** Shuyu Olivia Zhou, Alexandre B. Leitão, Francis M. Jiggins.

**Supervision:** Alexandre B. Leitão, Francis M. Jiggins.

**Visualization:** Shuyu Olivia Zhou, Ramesh Arunkumar.

**Writing – original draft:** Shuyu Olivia Zhou, Francis M. Jiggins.

**Writing – review & editing:** Ramesh Arunkumar, Alexandre B. Leitão, Francis M. Jiggins.

## References

1. Westra ER, van Houte S, Oyesiku-Blakemore S, Makin B, Broniewski JM, Best A, et al. Parasite Exposure Drives Selective Evolution of Constitutive versus Inducible Defense. *Curr Biol*. 2015 Apr 20; 25(8):1043–9. <https://doi.org/10.1016/j.cub.2015.01.065> PMID: 25772450
2. Boots M, Best A. The evolution of constitutive and induced defences to infectious disease. *Proc R Soc B Biol Sci*. 2018 Jul 25; 285(1883):20180658. <https://doi.org/10.1098/rspb.2018.0658> PMID: 30051865
3. Paludan SR, Pradeu T, Masters SL, Mogensen TH. Constitutive immune mechanisms: mediators of host defence and immune regulation. *Nat Rev Immunol*. 2021 Mar; 21(3):137–50. <https://doi.org/10.1038/s41577-020-0391-5> PMID: 32782357
4. Lemaitre B, Hoffmann J. The Host Defense of *Drosophila melanogaster*. *Annu Rev Immunol*. 2007; 25(1):697–743. <https://doi.org/10.1146/annurev.immunol.25.022106.141615> PMID: 17201680
5. Kraaijeveld AR, Godfray HCJ. Trade-off between parasitoid resistance and larval competitive ability in *Drosophila melanogaster*. *Nature*. 1997 Sep; 389(6648):278–80. <https://doi.org/10.1038/38483> PMID: 9305840
6. Kraaijeveld AR, Ferrari J, Godfray HCJ. Costs of resistance in insect-parasite and insect-parasitoid interactions. *Parasitology*. 2002 Oct; 125(7):S71–82. <https://doi.org/10.1017/s0031182002001750> PMID: 12622330
7. Bajgar A, Kucerova K, Jonatova L, Tomcala A, Schneedorferova I, Okrouhlik J, et al. Extracellular Adenosine Mediates a Systemic Metabolic Switch during Immune Response. *PLOS Biol*. 2015 Apr 27; 13(4):e1002135. <https://doi.org/10.1371/journal.pbio.1002135> PMID: 25915062
8. Leitão AB, Arunkumar R, Day JP, Geldman EM, Morin-Poulard I, Crozatier M, et al. Constitutive activation of cellular immunity underlies the evolution of resistance to infection in *Drosophila*. *eLife*. 2020 Dec 24; 9:e59095. <https://doi.org/10.7554/eLife.59095> PMID: 33357377
9. Kamiya T, Oña L, Wertheim B, van Doorn GS. Coevolutionary feedback elevates constitutive immune defence: a protein network model. *BMC Evol Biol*. 2016 May 5; 16(1):92. <https://doi.org/10.1186/s12862-016-0667-3> PMID: 27150135
10. Hamilton R, Siva-Jothy M, Boots M. Two arms are better than one: parasite variation leads to combined inducible and constitutive innate immune responses. *Proc R Soc B Biol Sci*. 2008 Jan 29; 275(1637):937–45. <https://doi.org/10.1098/rspb.2007.1574> PMID: 18230594
11. Cressler CE, Graham AL, Day T. Evolution of hosts paying manifold costs of defence. *Proc R Soc B Biol Sci*. 2015 Apr 7; 282(1804):20150065. <https://doi.org/10.1098/rspb.2015.0065> PMID: 25740895
12. Kraaijeveld AR, Limentani EC, Godfray HC. Basis of the trade-off between parasitoid resistance and larval competitive ability in *Drosophila melanogaster*. *Proc Biol Sci*. 2001 Feb 7; 268(1464):259–61. <https://doi.org/10.1098/rspb.2000.1354> PMID: 11217895
13. Buchon N, Silverman N, Cherry S. Immunity in *Drosophila melanogaster*—from microbial recognition to whole-organism physiology. *Nat Rev Immunol*. 2014 Dec; 14(12):796–810. <https://doi.org/10.1038/nri3763> PMID: 25421701
14. Yu S, Luo F, Xu Y, Zhang Y, Jin LH. *Drosophila* Innate Immunity Involves Multiple Signaling Pathways and Coordinated Communication Between Different Tissues. *Front Immunol*. 2022 Jul 7; 13:905370. <https://doi.org/10.3389/fimmu.2022.905370> PMID: 35911716
15. Anderl I, Vesala L, Ihalainen TO, Vanha-aho LM, Andó I, Rämetsä M, et al. Transdifferentiation and Proliferation in Two Distinct Hemocyte Lineages in *Drosophila melanogaster* Larvae after Wasp Infection. 2016;
16. Lavine MD, Strand MR. Insect hemocytes and their role in immunity. *Insect Biochem Mol Biol*. 2002;15. [https://doi.org/10.1016/s0965-1748\(02\)00092-9](https://doi.org/10.1016/s0965-1748(02)00092-9) PMID: 12225920
17. Eleftherianos I, Heryanto C, Bassal T, Zhang W, Tettamanti G, Mohamed A. Haemocyte-mediated immunity in insects: Cells, processes and associated components in the fight against pathogens and parasites. *Immunology*. 2021; <https://doi.org/10.1111/imm.13390> PMID: 34233014

18. Dudzic JP, Kondo S, Ueda R, Bergman CM, Lemaitre B. *Drosophila* innate immunity: regional and functional specialization of prophenoloxidases. *BMC Biol.* 2015 Oct 1; 13(1):81. <https://doi.org/10.1186/s12915-015-0193-6> PMID: 26437768
19. Dostálová A, Rommelaere S, Poidevin M, Lemaitre B. Thioester-containing proteins regulate the Toll pathway and play a role in *Drosophila* defence against microbial pathogens and parasitoid wasps. *BMC Biol.* 2017; 15(1):79–79. <https://doi.org/10.1186/s12915-017-0408-0> PMID: 28874153
20. Arunkumar R, Zhou SO, Day JP, Bakare S, Pitton S, Zhang Y, et al. Natural selection has driven the recurrent loss of an immunity gene that protects *Drosophila* against a major natural parasite. *Proc Natl Acad Sci.* 2023 Aug 15; 120(33):e2211019120. <https://doi.org/10.1073/pnas.2211019120> PMID: 37552757
21. Tang H, Kambris Z, Lemaitre B, Hashimoto C. Two proteases defining a melanization cascade in the immune system of *Drosophila*. *J Biol Chem.* 2006 Sep; 281(38):28097–104. <https://doi.org/10.1074/jbc.M601642200> PMID: 16861233
22. Dudzic JP, Hanson MA, Iatsenko I, Kondo S, Lemaitre B. More Than Black or White: Melanization and Toll Signaling Regulate Serine Proteases in *Drosophila*. *Cell Rep.* 2019 Apr 23; 27(4):1050–1061.e3. <https://doi.org/10.1016/j.celrep.2019.03.101> PMID: 31018123
23. Yang H, Kronhamn J, Ekström JO, Korkut GG, Hultmark D. JAK/STAT signaling in *Drosophila* muscles controls the cellular immune response against parasitoid infection. *EMBO Rep.* 2015 Dec; 16(12):1664–72. <https://doi.org/10.15252/embr.201540277> PMID: 26412855
24. Clemmons AW, Lindsay SA, Wasserman SA. An Effector Peptide Family Required for *Drosophila* Toll-Mediated Immunity. *PLoS Pathog.* 2015 Apr; 11(4). <https://doi.org/10.1371/journal.ppat.1004876> PMID: 25915418
25. Cao X, Jiang H. Building a platform for predicting functions of serine protease-related proteins in *Drosophila melanogaster* and other insects. *Insect Biochem Mol Biol.* 2018 Dec; 103:53–69. <https://doi.org/10.1016/j.ibmb.2018.10.006> PMID: 30367934
26. Castillejo-López C, Häcker U. The serine protease Sp7 is expressed in blood cells and regulates the melanization reaction in *Drosophila*. *Biochem Biophys Res Commun.* 2005 Dec; 338(2):1075–82. <https://doi.org/10.1016/j.bbrc.2005.10.042> PMID: 16256951
27. Nam HJ, Jang IH, You H, Lee KA, Lee WJ. Genetic evidence of a redox-dependent systemic wound response via Hsxn Protease-Phenoloxidase system in *Drosophila*. *EMBO J.* 2012 Mar 7; 31(5):1253–65. <https://doi.org/10.1038/emboj.2011.476> PMID: 22227521
28. Valanne S, Wang JH, Rämetsä M. The *Drosophila* Toll Signaling Pathway. *Artic J Immunol.* 2011; <https://doi.org/10.4049/jimmunol.1002302> PMID: 21209287
29. Leitão AB, Arunkumar R, Day JP, Hanna N, Devi A, Hayes MP, et al. Recognition of non-self is necessary to activate *Drosophila*'s immune response against an insect parasite [Internet]. *bioRxiv*; 2022 [cited 2023 Aug 1]. p. 2022.06.28.497890. Available from: <https://www.biorxiv.org/content/10.1101/2022.06.28.497890v1>
30. Kim-Jo C, Gatti JL, Poirié M. *Drosophila* Cellular Immunity Against Parasitoid Wasps: A Complex and Time-Dependent Process. *Front Physiol* [Internet]. 2019 [cited 2023 Jul 8]; 10. Available from: <https://www.frontiersin.org/articles/10.3389/fphys.2019.00603> PMID: 31156469
31. Bach EA, Ekas LA, Ayala-Camargo A, Flaherty MS, Lee H, Perrimon N, et al. GFP reporters detect the activation of the *Drosophila* JAK/STAT pathway in vivo. *Gene Expr Patterns GEP.* 2007 Jan; 7(3):323–31. <https://doi.org/10.1016/j.modgep.2006.08.003> PMID: 17008134
32. Sorrentino RP, Melk JP, Govind S. Genetic Analysis of Contributions of Dorsal Group and JAK-Stat92E Pathway Genes to Larval Hemocyte Concentration and the Egg Encapsulation Response in *Drosophila*. *Genetics.* 2004; <https://doi.org/10.1534/genetics.166.3.1343> PMID: 15082553
33. Shudo E, Iwasa Y. Inducible defense against pathogens and parasites: optimal choice among multiple options. *J Theor Biol.* 2001 Mar 21; 209(2):233–47. <https://doi.org/10.1006/jtbi.2000.2259> PMID: 11401465
34. Martin LB, Hanson HE, Hauber ME, Ghalambor CK. Genes, Environments, and Phenotypic Plasticity in Immunology. *Trends Immunol.* 2021 Mar 1; 42(3):198–208. <https://doi.org/10.1016/j.it.2021.01.002> PMID: 33518415
35. Dupont L, Thierry M, Zinger L, Legrand D, Jacob S. Beyond reaction norms: the temporal dynamics of phenotypic plasticity. *Trends Ecol Evol* [Internet]. 2023 Sep 15 [cited 2023 Nov 27];0(0). Available from: [https://www.cell.com/trends/ecology-evolution/abstract/S0169-5347\(23\)00225-2](https://www.cell.com/trends/ecology-evolution/abstract/S0169-5347(23)00225-2) <https://doi.org/10.1016/j.tree.2023.08.014> PMID: 37718228
36. Agaisse H, Petersen UM, Boutros M, Mathey-Prevot B, Perrimon N. Signaling Role of Hemocytes in *Drosophila* JAK/STAT-Dependent Response to Septic Injury. *Dev Cell.* 2003 Sep 1; 5(3):441–50. [https://doi.org/10.1016/s1534-5807\(03\)00244-2](https://doi.org/10.1016/s1534-5807(03)00244-2) PMID: 12967563

37. Lagueux M, Perrodou E, Levashina EA, Capovilla M, Hoffmann JA. Constitutive expression of a complement-like protein in Toll and JAK gain-of-function mutants of *Drosophila*. *Proc Natl Acad Sci U S A*. 2000; 97(21):11427–32. <https://doi.org/10.1073/pnas.97.21.11427> PMID: 11027343
38. Boutros M, Agaisse H, Perrimon N. Sequential activation of signaling pathways during innate immune responses in *Drosophila*. *Dev Cell*. 2002 Nov; 3(5):711–22. [https://doi.org/10.1016/s1534-5807\(02\)00325-8](https://doi.org/10.1016/s1534-5807(02)00325-8) PMID: 12431377
39. Eslin P, Prévost G. Racing against host's immunity defenses: a likely strategy for passive evasion of encapsulation in *Asobara tabida* parasitoids. *J Insect Physiol*. 2000 Aug 1; 46(8):1161–7. [https://doi.org/10.1016/s0022-1910\(99\)00227-9](https://doi.org/10.1016/s0022-1910(99)00227-9) PMID: 10818243
40. Kraaijeveld AR, Alphen JJMV. Geographical variation in resistance of the parasitoid *Asobara tabida* against encapsulation by *Drosophila melanogaster* larvae: the mechanism explored. *Physiol Entomol*. 1994; 19(1):9–14.
41. Schlenke TA, Morales J, Govind S, Clark AG. Contrasting Infection Strategies in Generalist and Specialist Wasp Parasitoids of *Drosophila melanogaster*. Schneider DS, editor. *PLoS Pathog*. 2007 Oct; 3(10):e158–e158. <https://doi.org/10.1371/journal.ppat.0030158> PMID: 17967061
42. Huang J, Chen J, Fang G, Pang L, Zhou S, Zhou Y, et al. Two novel venom proteins underlie divergent parasitic strategies between a generalist and a specialist parasite. *Nat Commun*. 2021 Dec; 12(1):1–16.
43. Ivanov P, Anderson P. Post-transcriptional regulatory networks in immunity. *Immunol Rev*. 2013; 253(1):253–72. <https://doi.org/10.1111/imr.12051> PMID: 23550651
44. Murray RZ, Stow JL. Cytokine Secretion in Macrophages: SNAREs, Rabs, and Membrane Trafficking. *Front Immunol* [Internet]. 2014 [cited 2023 Sep 25]; 5. Available from: <https://www.frontiersin.org/articles/10.3389/fimmu.2014.00538> PMID: 25386181
45. Lazzaro BP, Tate AT. Balancing sensitivity, risk, and immunopathology in immune regulation. *Curr Opin Insect Sci*. 2022 Apr 1; 50:100874. <https://doi.org/10.1016/j.cois.2022.100874> PMID: 35051619
46. Pursall ER, Rolff J. Immune Responses Accelerate Ageing: Proof-of-Principle in an Insect Model. *PLOS ONE*. 2011 May 18; 6(5):e19972. <https://doi.org/10.1371/journal.pone.0019972> PMID: 21625631
47. Sadd BM, Siva-Jothy MT. Self-harm caused by an insect's innate immunity. *Proc R Soc B Biol Sci*. 2006 Aug; 273(1600):2571–4. <https://doi.org/10.1098/rspb.2006.3574> PMID: 16959651
48. Khan I, Agashe D, Rolff J. Early-life inflammation, immune response and ageing. *Proc R Soc B Biol Sci*. 2017 Mar 8; 284(1850):20170125.
49. Shit B, Prakash A, Sarkar S, Vale PF, Khan I. Ageing leads to reduced specificity of antimicrobial peptide responses in *Drosophila melanogaster*. *Proc R Soc B Biol Sci*. 2022 Nov 16; 289(1987):20221642. <https://doi.org/10.1098/rspb.2022.1642> PMID: 36382522
50. Zerofsky M, Harel E, Silverman N, Tatar M. Aging of the innate immune response in *Drosophila melanogaster*. *Aging Cell*. 2005; 4(2):103–8. <https://doi.org/10.1111/j.1474-9728.2005.00147.x> PMID: 15771614
51. Badinloo M, Nguyen E, Suh W, Alzahrani F, Castellanos J, Klichko VI, et al. Overexpression of antimicrobial peptides contributes to aging through cytotoxic effects in *Drosophila* tissues. *Arch Insect Biochem Physiol*. 2018; 98(4):e21464. <https://doi.org/10.1002/arch.21464> PMID: 29637607
52. Banerjee S, Biehl A, Gadina M, Hasni S, Schwartz DM. JAK–STAT Signaling as a Target for Inflammatory and Autoimmune Diseases: Current and Future Prospects. *Drugs*. 2017 Apr 1; 77(5):521–46. <https://doi.org/10.1007/s40265-017-0701-9> PMID: 28255960
53. Varaldi J, Petit S, Boulétreau M, Fleury F. The virus infecting the parasitoid *Leptopilina boulardi* exerts a specific action on superparasitism behaviour. *Parasitology*. 2006 Jun; 132(Pt 6):747–56. <https://doi.org/10.1017/S0031182006009930> PMID: 16700960
54. Dobin A, Davis CA, Schlesinger F, Drenkow J, Zaleski C, Jha S, et al. STAR: ultrafast universal RNA-seq aligner. *Bioinformatics*. 2013 Jan; 29(1):15–21. <https://doi.org/10.1093/bioinformatics/bts635> PMID: 23104886
55. Pei J, Kinch LN, Grishin NV. FlyXCDB—A Resource for *Drosophila* Cell Surface and Secreted Proteins and Their Extracellular Domains. *J Mol Biol*. 2018 Sep 14; 430(18, Part B):3353–411. <https://doi.org/10.1016/j.jmb.2018.06.002> PMID: 29890119
56. Warnes GR, Bolker B, Bonebakker L, Gentleman R, Huber W, Liaw A, et al. gplots: Various R Programming Tools for Plotting Data [Internet]. 2022 [cited 2023 Nov 13]. Available from: <https://cran.r-project.org/web/packages/gplots/index.html>
57. Neuwirth E. RColorBrewer: ColorBrewer Palettes [Internet]. 2022 [cited 2023 Nov 13]. Available from: <https://cran.r-project.org/web/packages/RColorBrewer/index.html>

58. Young MD, Wakefield MJ, Smyth GK, Oshlack A. Gene ontology analysis for RNA-seq: accounting for selection bias. *Genome Biol.* 2010 Feb 4; 11(2):R14. <https://doi.org/10.1186/gb-2010-11-2-r14> PMID: [20132535](https://pubmed.ncbi.nlm.nih.gov/20132535/)
59. Supek F, Bošnjak M, Škunca N, Šmuc T. REVIGO Summarizes and Visualizes Long Lists of Gene Ontology Terms. *PLOS ONE.* 2011 Jul 18; 6(7):e21800. <https://doi.org/10.1371/journal.pone.0021800> PMID: [21789182](https://pubmed.ncbi.nlm.nih.gov/21789182/)
60. Pinheiro JP, Bates D, DebRoy S, Sarkar DS, authors (src/rs.f) E, sigma) SH (Author fixed, et al. nlme: Linear and Nonlinear Mixed Effects Models [Internet]. 2023 [cited 2023 Sep 17]. Available from: <https://cran.r-project.org/web/packages/nlme/index.html>
61. Stuart T, Butler A, Hoffman P, Hafemeister C, Papalexi E, Mauck WM, et al. Comprehensive Integration of Single-Cell Data. *Cell.* 2019 Jun 13; 177(7):1888–1902.e21. <https://doi.org/10.1016/j.cell.2019.05.031> PMID: [31178118](https://pubmed.ncbi.nlm.nih.gov/31178118/)
62. Wickham H. Reshaping Data with the reshape Package. *J Stat Softw.* 2007 Nov 13; 21:1–20.
